# Supplementary material for: Crowdsourcing triggers rapid, reliable earthquake locations
Source: PubMed Central journal article supplement — Sci Adv. 2019 Apr 3;5(4):eaau9824. doi: 10.1126/sciadv.aau9824 (PMC6447384; doi:10.1126/sciadv.aau9824), 2019-04-03
Supplement: aau9824_SM.pdf [file aau9824_SM.pdf]

## Supplementary Materials for

### Crowdsourcing triggers rapid, reliable earthquake locations

Robert J. Steed\*, Amaya Fuenzalida, Rémy Bossu\*, István Bondár, Andres Heinloo,  
Aurelien Dupont, Joachim Saul, Angelo Strollo

\*Corresponding author. Email: bossu@emsc-csem.org (R.B.); robert.steed@emsc-csem.org (R.J.S.)

Published 3 April 2019, *Sci. Adv.* **5**, eaau9824 (2019)  
DOI: 10.1126/sciadv.aau9824

#### This PDF file includes:

Fig. S1. Analysis of the crowdsourced detections during 2016–2017 that could be associated with EMSC-published epicenters, considering each detection method individually.

Fig. S2. A Venn diagram of the earthquakes detected by each crowdsourced system during 2016–2017.

Fig. S3. Scatter graphs showing all obtained locations for the 10th iteration of the CsLoc analyses for all 2200 detections that were associated with an EMSC epicenter.

Fig. S4. Summary of the test dataset and its results starting from the 2590 crowdsourced detections; the transition from “seismic” to “distinct earthquakes” corresponds to the deduplication of detections from the multiple crowdsourced detection methods.

Fig. S5. An analysis of the 735 earthquakes located by CsLoc with respect to earthquake magnitude.

Fig. S6. The earthquakes located by CsLoc and GEOFON by earthquake magnitude; CsLoc had a wider spectrum of magnitudes, locating a larger number of events of magnitude lower than M5 with respect to GEOFON in the first 10 min.

Table S1. Summary statistics for crowdsourced detections at the EMSC during 2016–2017.

Table S2. Summary statistics for the earthquakes detected by each crowdsourced detection.

Table S3. Summary of the 735 earthquakes located by CsLoc that met the publication criteria.

Table S4. Statistics for the 429 earthquakes located by both GEOFON and CsLoc within 10 min of the origin time.

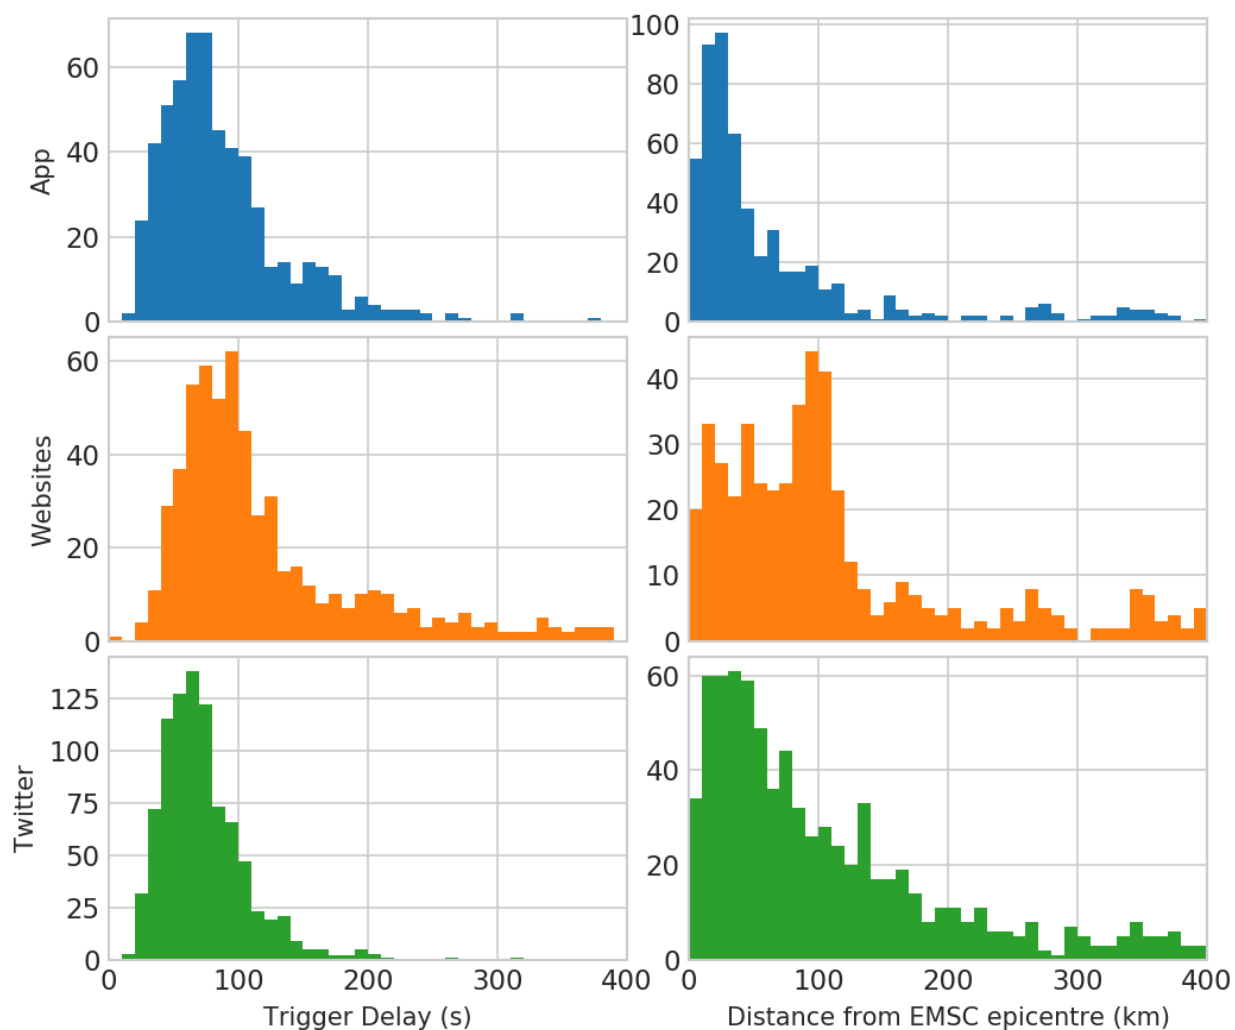

**Fig. S1. Analysis of the crowdsourced detections during 2016–2017 that could be associated with EMSC-published epicenters, considering each detection method individually.** Any duplicate detections made by a given system have been removed, keeping only the earliest. (A,B,C) distribution of trigger delays for each system. (D-F) histograms of location accuracy. It can be seen that the app detection system yields the most accurate barycenters.

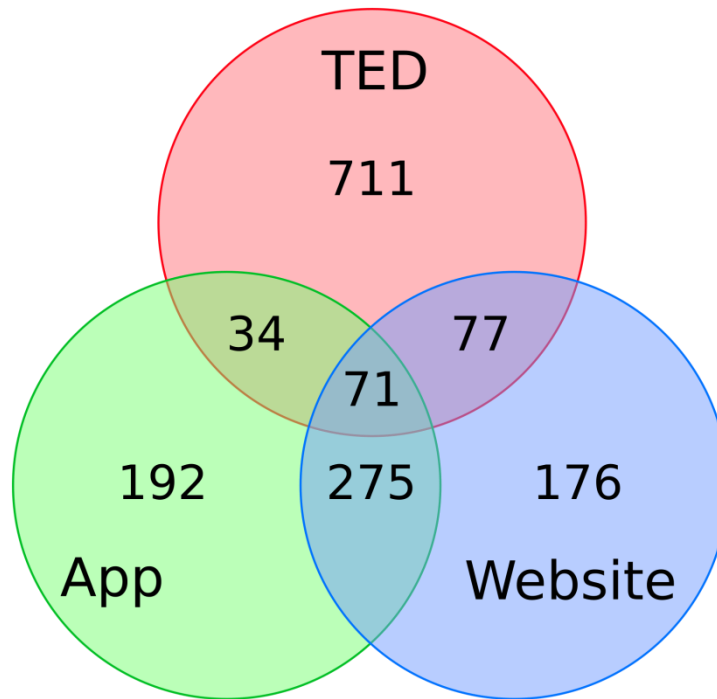

**Fig. S2. A Venn diagram of the earthquakes detected by each crowdsourced system during 2016–2017.** This shows that the systems are complementary since different earthquakes were detected by each method, despite there being some overlap in detections.

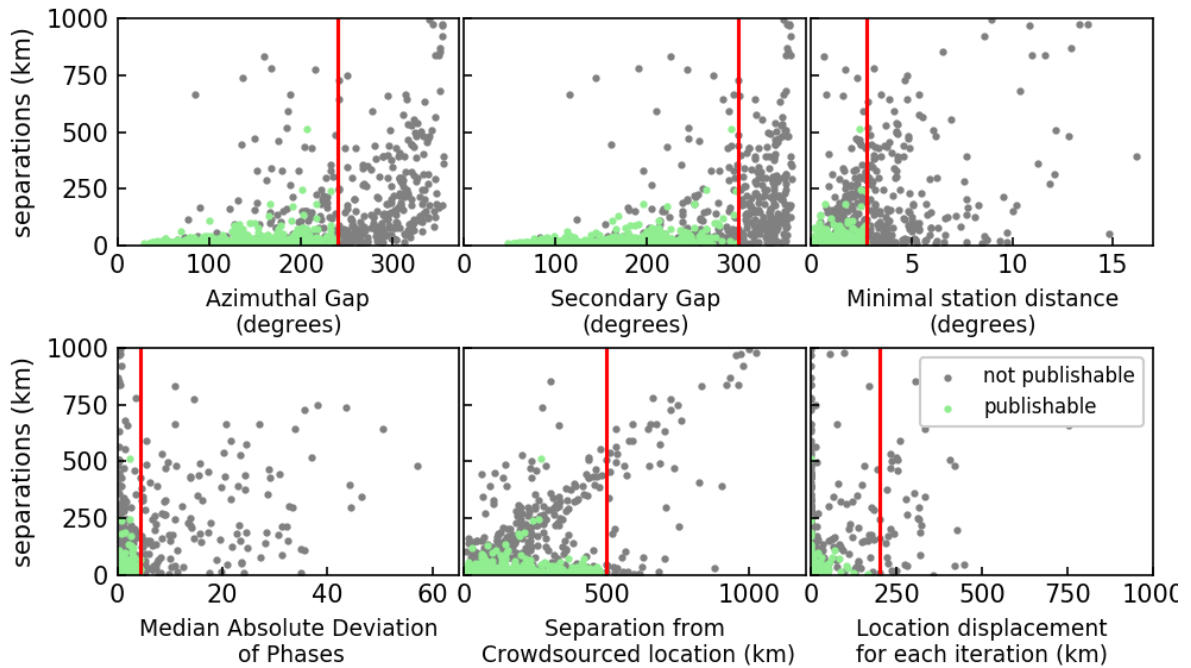

**Fig. S3. Scatter graphs showing all obtained locations for the 10th iteration of the CsLoc analyses for all 2200 detections that were associated with an EMSC epicenter.** The distance between the location found and the EMSC epicenter is plotted with respect to the parameters used for the publication criteria. The red lines show the threshold for each parameter and marker color shows whether a result met the criteria.

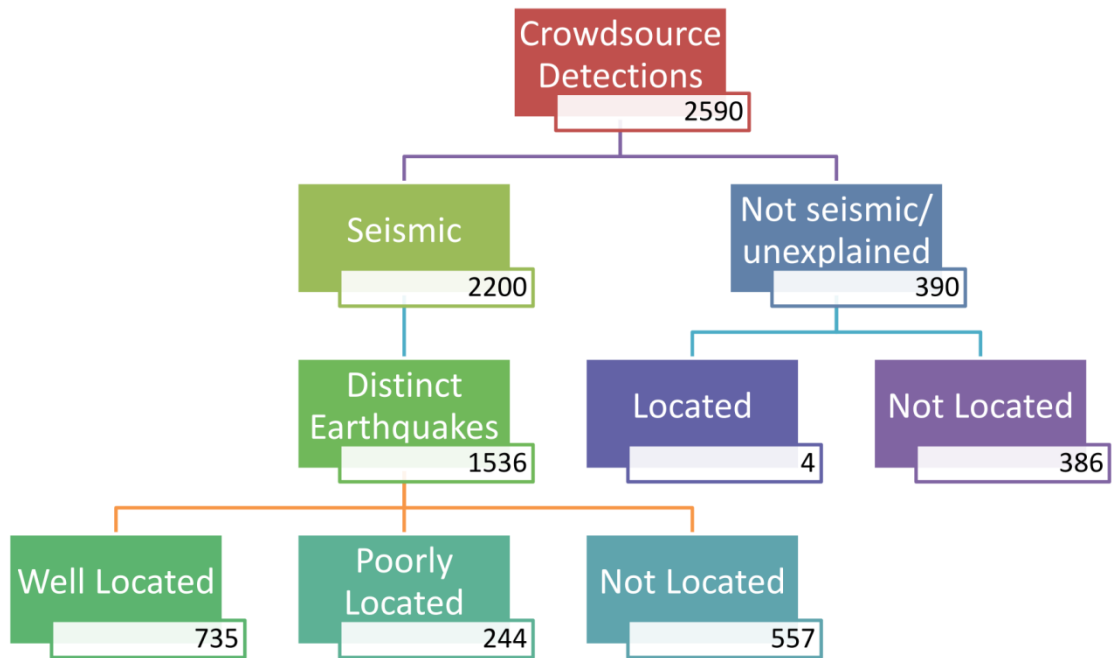

**Fig. S4. Summary of the test dataset and its results starting from the 2590 crowdsourced detections; the transition from “seismic” to “distinct earthquakes” corresponds to the deduplication of detections from the multiple crowdsourced detection methods. ‘Well Located’ corresponds to earthquakes with at least one location that fulfilled the publication criteria while ‘Poorly Located’ results are those that did not.**

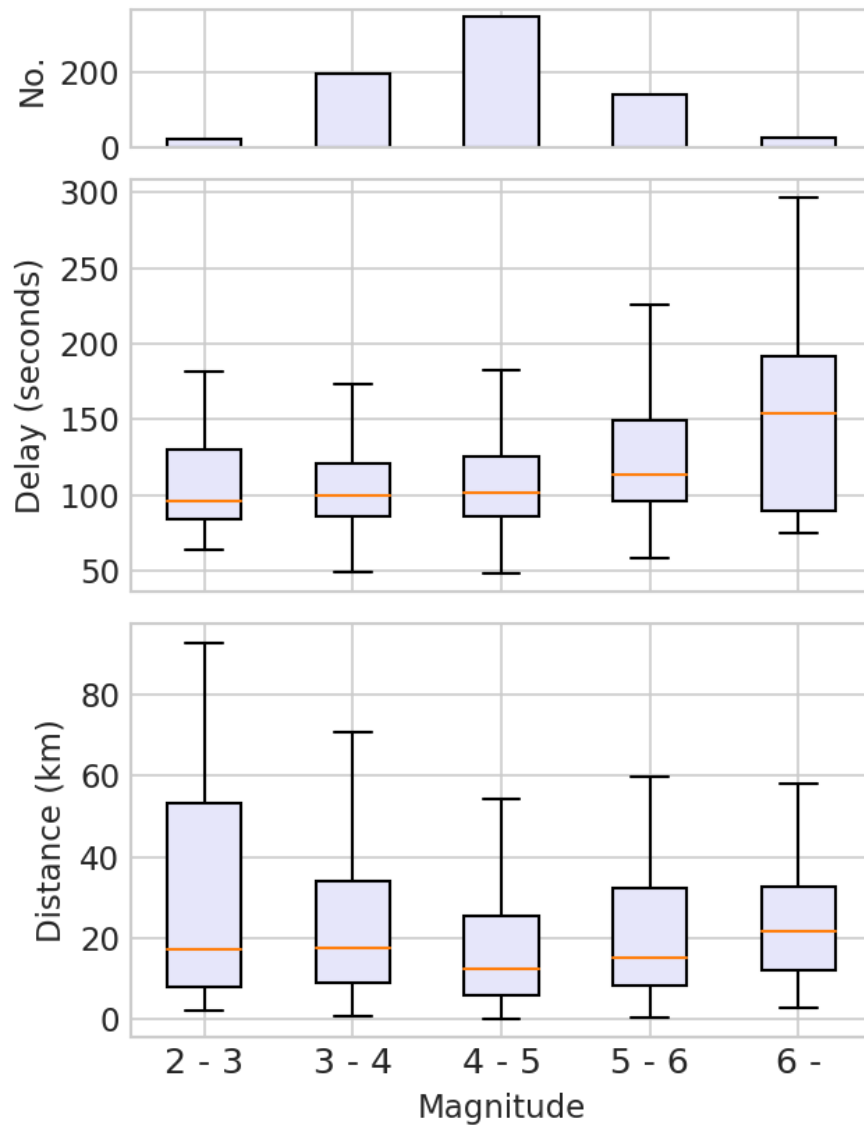

**Fig. S5. An analysis of the 735 earthquakes located by CsLoc with respect to earthquake magnitude.** The outlying categories contain a small number of events and hence show larger variance and less confidence is placed in their values. The inner categories show that CsLoc is largely magnitude independent between M2 – M6.

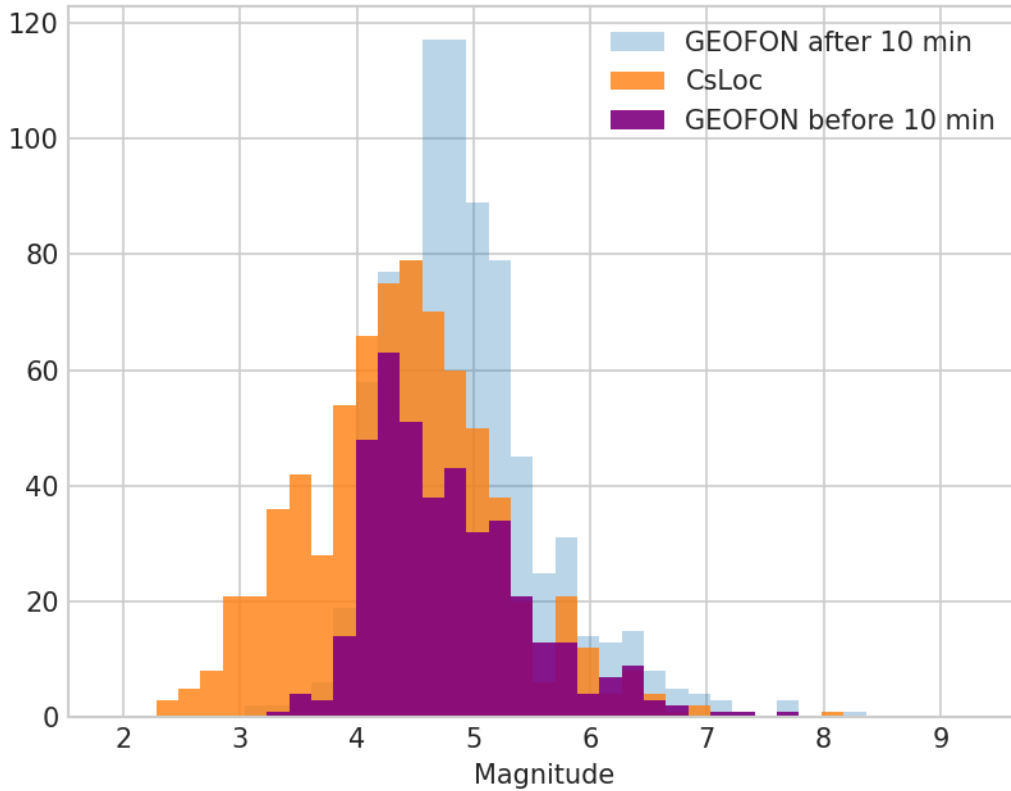

**Fig. S6. The earthquakes located by CsLoc and GEOFON by earthquake magnitude; CsLoc had a wider spectrum of magnitudes, locating a larger number of events of magnitude lower than M5 with respect to GEOFON in the first 10 min.** However GEOFON located a large number of big events after 10 minutes via teleseismic inversion. CsLoc works at multiscale; it can detect and locate events of different magnitudes worldwide, depending only on the regional station coverage. As long as an earthquake is felt and triggers a crowdsourced detection, there is no minimum threshold on the magnitude preventing it to be located.

**Table S1. Summary statistics for crowdsourced detections at the EMSC during 2016–2017.**

For the website and app detections, the dataset contains duplicate detections for some earthquakes due to detections in neighboring countries. There were also detections of the same earthquake by the multiple systems, as seen in the final row.

| system        | detections | duplications<br>(within each system) | false or<br>unexplained | distinct earthquakes<br>(for each system) |
|---------------|------------|--------------------------------------|-------------------------|-------------------------------------------|
| app           | 803        | 67                                   | 164                     | 572                                       |
| website       | 723        | 69                                   | 55                      | 599                                       |
| Twitter (TED) | 1064       | 0                                    | 171                     | 893                                       |

|         | detections | duplications<br>(across all systems) | false or<br>unexplained | distinct earthquakes<br>(across all systems) |
|---------|------------|--------------------------------------|-------------------------|----------------------------------------------|
| overall | 2590       | 664                                  | 390                     | 1536                                         |

**Table S2. Summary statistics for the earthquakes detected by each crowdsourced detection.**

The detection delay and location accuracy compare the crowdsourced values to the EMSC epicenter values.

| system        | earthquakes | detection delay (s) |     |     | location accuracy (km) |     |     |
|---------------|-------------|---------------------|-----|-----|------------------------|-----|-----|
|               |             | percentiles         |     |     | percentiles            |     |     |
|               |             | 10%                 | 50% | 90% | 10%                    | 50% | 90% |
| app           | 572         | 37                  | 76  | 158 | 10                     | 36  | 269 |
| website       | 599         | 55                  | 98  | 273 | 23                     | 103 | 459 |
| Twitter (TED) | 893         | 38                  | 67  | 113 | 19                     | 94  | 530 |
| overall       | 1536        | 38                  | 70  | 134 | 15                     | 72  | 431 |



**Table S3. Summary of the 735 earthquakes located by CsLoc that met the publication criteria.** For each system, the earliest publishable analysis for each earthquake is used for calculating the statistics. This is done likewise for the global result which removes some duplicated detections made by the systems. Delays and separations are calculated w.r.t. EMSC published epicenter values.

| system  | earth-<br>quakes | detection delay (s) |     |     | phase collection<br>delay (s) |     |     | CsLoc analysis<br>finished (s) |     |     | EMSC publication<br>delay (s) |     |      | CsLoc Location<br>accuracy (km) |     |     |
|---------|------------------|---------------------|-----|-----|-------------------------------|-----|-----|--------------------------------|-----|-----|-------------------------------|-----|------|---------------------------------|-----|-----|
|         |                  | percentiles         |     |     | percentiles                   |     |     | percentiles                    |     |     | percentiles                   |     |      | percentiles                     |     |     |
|         |                  | 10%                 | 50% | 90% | 10%                           | 50% | 90% | 10%                            | 50% | 90% | 10%                           | 50% | 90%  | 10%                             | 50% | 90% |
| app     | 331              | 43                  | 76  | 121 | 74                            | 98  | 163 | 77                             | 102 | 365 | 133                           | 272 | 676  | 4                               | 14  | 48  |
| website | 324              | 56                  | 93  | 182 | 79                            | 115 | 205 | 81                             | 119 | 210 | 136                           | 267 | 669  | 3                               | 11  | 46  |
| Twitter | 335              | 44                  | 68  | 103 | 75                            | 104 | 168 | 78                             | 108 | 172 | 233                           | 488 | 1427 | 4                               | 15  | 49  |
| overall | 735              | 46                  | 73  | 120 | 74                            | 100 | 171 | 77                             | 103 | 174 | 148                           | 384 | 1131 | 4                               | 15  | 54  |

**Table S4. Statistics for the 429 earthquakes located by both GEOFON and CsLoc within 10 min of the origin time.** Delays and separations are calculated with respect to the published EMSC epicenter values.

| System | publication delays (s) |     |     | location accuracy (km) |     |     |
|--------|------------------------|-----|-----|------------------------|-----|-----|
|        | percentiles            |     |     | percentiles            |     |     |
|        | 10%                    | 50% | 90% | 10%                    | 50% | 90% |
| CsLoc  | 76                     | 103 | 173 | 3                      | 14  | 46  |
| GEOFON | 126                    | 179 | 393 | 3                      | 10  | 22  |
| EMSC   | 144                    | 374 | 518 | -                      | -   | -   |
